# Supplementary material
Source: Springer Nature journal article supplement (https://www.springermedizin.de/resource/supplementary/13012_2013_735_MOESM1_ESM.pdf/9630554)

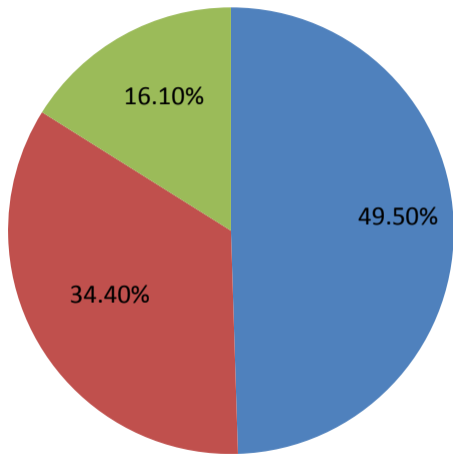

■ Central circle (most important)

■ Middle circle

■ Outer circle (indicating 'weak tie')

Supplement: MOESM1 [file 9630554]
